# Supplementary material for: Green synthesis of new chiral 1-(arylamino)imidazo[2,1-a]isoindole-2,5-diones from the corresponding α-amino acid arylhydrazides in aqueous medium
Source: publisher site journal article supplement (doi:10.3762/bjoc.14.271), 2018-11-26
Supplement: Additional file 3 [file 1860-5397-14-271-S3.pdf]

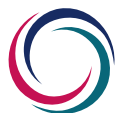

## Supporting Information

for

### **Green synthesis of new chiral 1-(arylamino)imidazo[2,1-a]isoindole-2,5-diones from the corresponding $\alpha$ -amino acid arylhydrazides in aqueous medium**

Nadia Bouzayani, Jamil Kraïem, Sylvain Marque, Yakdhane Kacem, Abel Carlin-Sinclair, Jérôme Marrot and Béchir Ben Hassine

*Beilstein J. Org. Chem.* **2018**, *14*, 2923–2930. doi:10.3762/bjoc.14.271

## HPLC analysis of the products

## Table of contents

|                                               |     |
|-----------------------------------------------|-----|
| 1. HPLC analysis of <b>5a</b> .....           | S2  |
| 2. HPLC analysis of <b>5b</b> .....           | S3  |
| 3. HPLC analysis of <b>5c</b> .....           | S4  |
| 4. HPLC analysis of <b>5d</b> .....           | S5  |
| 5. HPLC analysis of <b>5e</b> .....           | S6  |
| 6. HPLC analysis of <b>5f</b> .....           | S7  |
| 7. HPLC analysis of <b>5g</b> .....           | S8  |
| 8. HPLC analysis of <b>5h</b> .....           | S9  |
| 9. HPLC analysis of <b>5i</b> .....           | S10 |
| 10. HPLC analysis of <b>5j</b> .....          | S11 |
| 11. Tables of retention times and ratios..... | S12 |

### 1. HPLC analysis of **5a**

High performance liquid chromatography (HPLC) was performed on a Welk RR column (4.6 × 250 mm) (REGIS Technologies) using a mobile phase: heptane / iPrOH / CH<sub>2</sub>Cl<sub>2</sub> (50/40/10) with a flow rate of 1.0 mL / min at 25 °C.

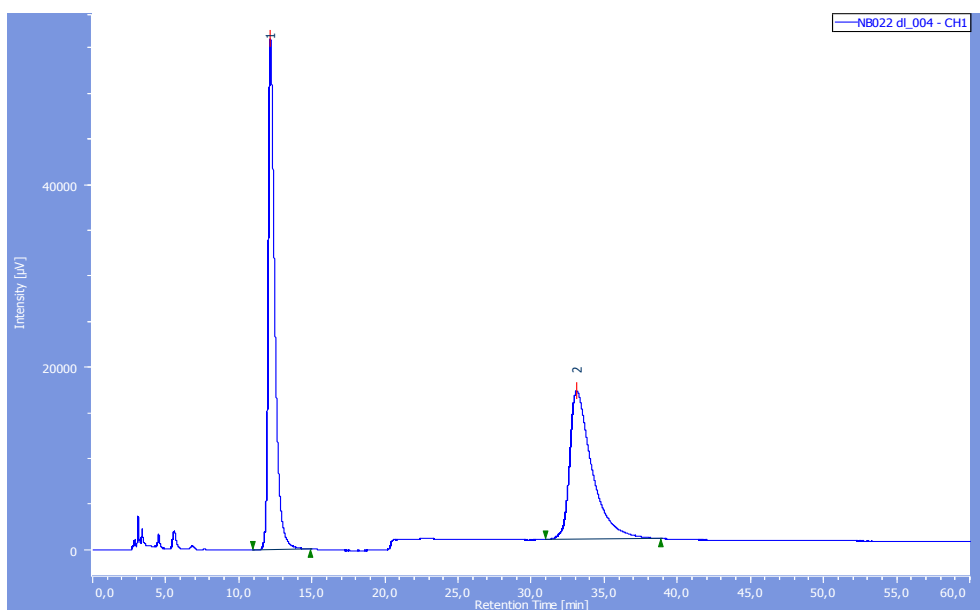

Chromatogram of the compound **5a** starting with the racemic phenylhydrazide **3a**

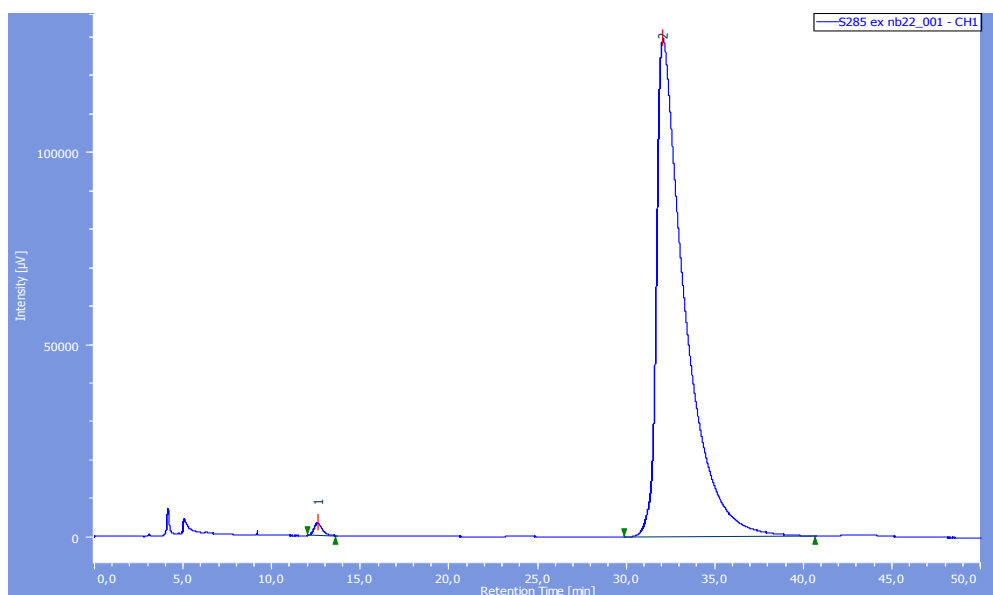

Chromatogram of the compound **5a** starting with (L)-phenylhydrazide **3a**

## 2. HPLC analysis of **5b**

High performance liquid chromatography (HPLC) was performed on a Welk RR column (4.6 × 250 mm) (REGIS Technologies) using a mobile phase: heptane / iPrOH / CH<sub>2</sub>Cl<sub>2</sub> (50/40/10) with a flow rate of 1.0 mL / min at 25 °C.

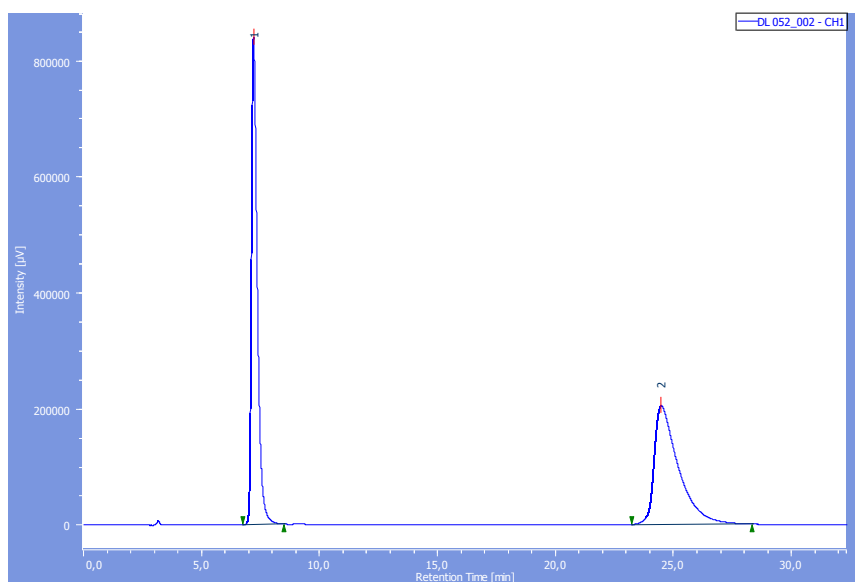

Chromatogram of the compound **5b** starting with the racemic phenylhydrazide **3b**

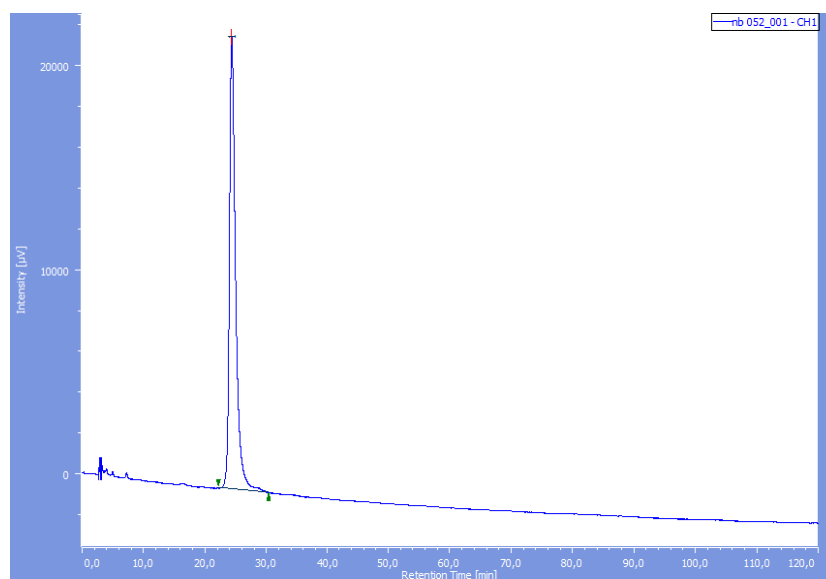

Chromatogram of the compound **5b** starting with (L)-phenylhydrazide **3b**

### 3. HPLC analysis of **5c**

High performance liquid chromatography (HPLC) was performed on a Welk RR column ( $4.6 \times 250$  mm) (REGIS Technologies) using a mobile phase: heptane / iPrOH (30/70) with a flow rate of 1.0 mL / min at 25 °C.

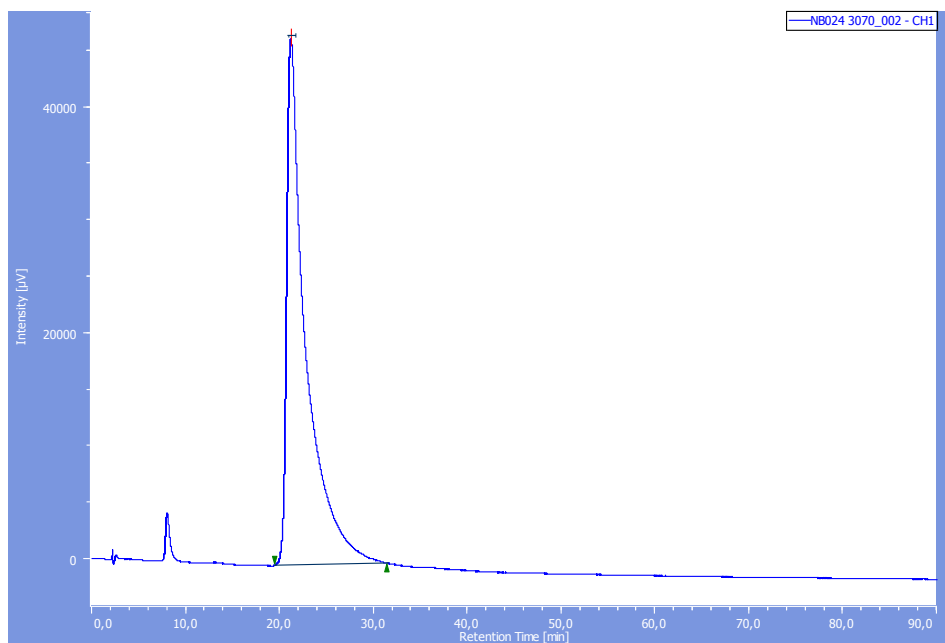

Chromatogram of the compound **5c** starting with (L)-phenylhydrazide **3c**

#### 4. HPLC analysis of **5d**

High performance liquid chromatography (HPLC) was performed on a Welk RR column (4.6 × 250 mm) (REGIS Technologies) using a mobile phase: heptane / iPrOH / CH<sub>2</sub>Cl<sub>2</sub> (50/40/10) with a flow rate of 1.0 mL / min at 25 °C.

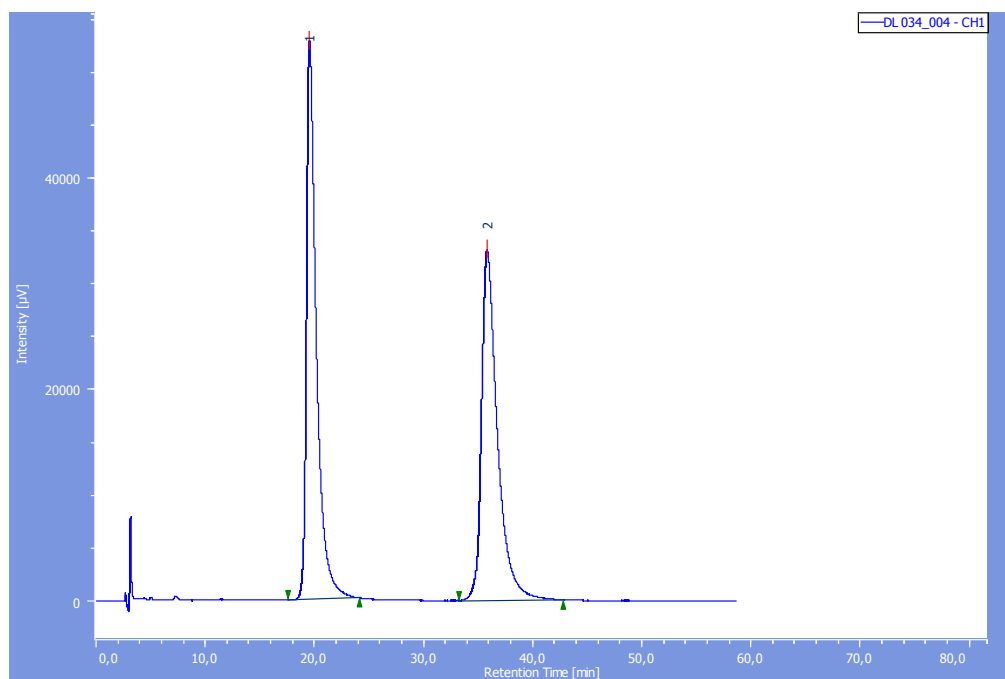

Chromatogram of the compound **5d** starting with the racemic phenylhydrazide **3d**

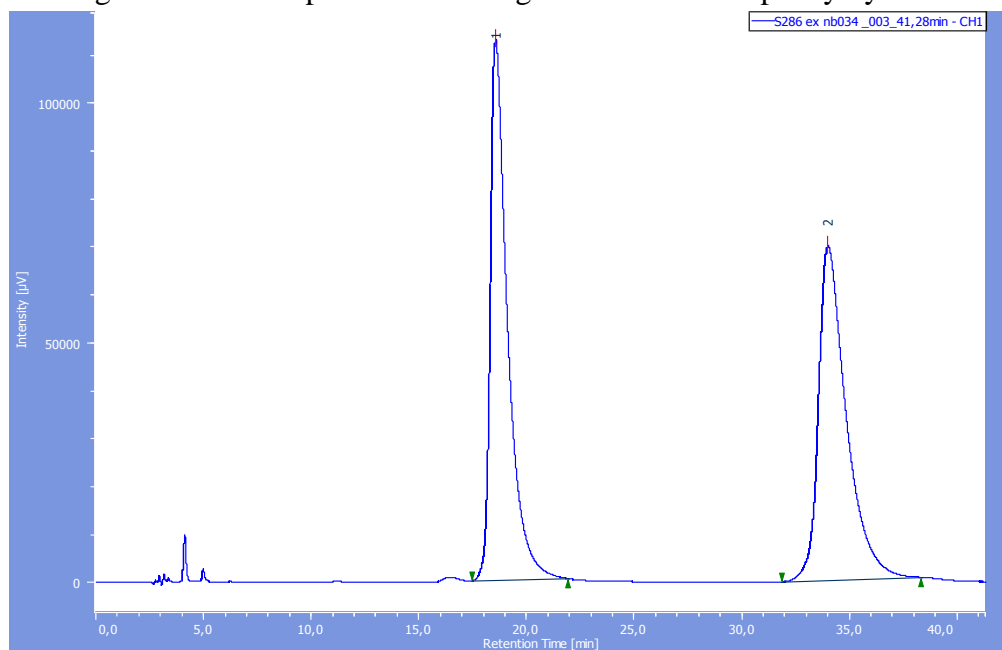

Chromatogram of the compound **5d** starting with (L)-phenylhydrazide **3d**

## 5. HPLC analysis of **5e**

High performance liquid chromatography (HPLC) was performed on a Welk RR column (4.6 × 250 mm) (REGIS Technologies) using a mobile phase: heptane / iPrOH / CH<sub>2</sub>Cl<sub>2</sub> (50/40/10) with a flow rate of 1.0 mL / min at 25 °C.

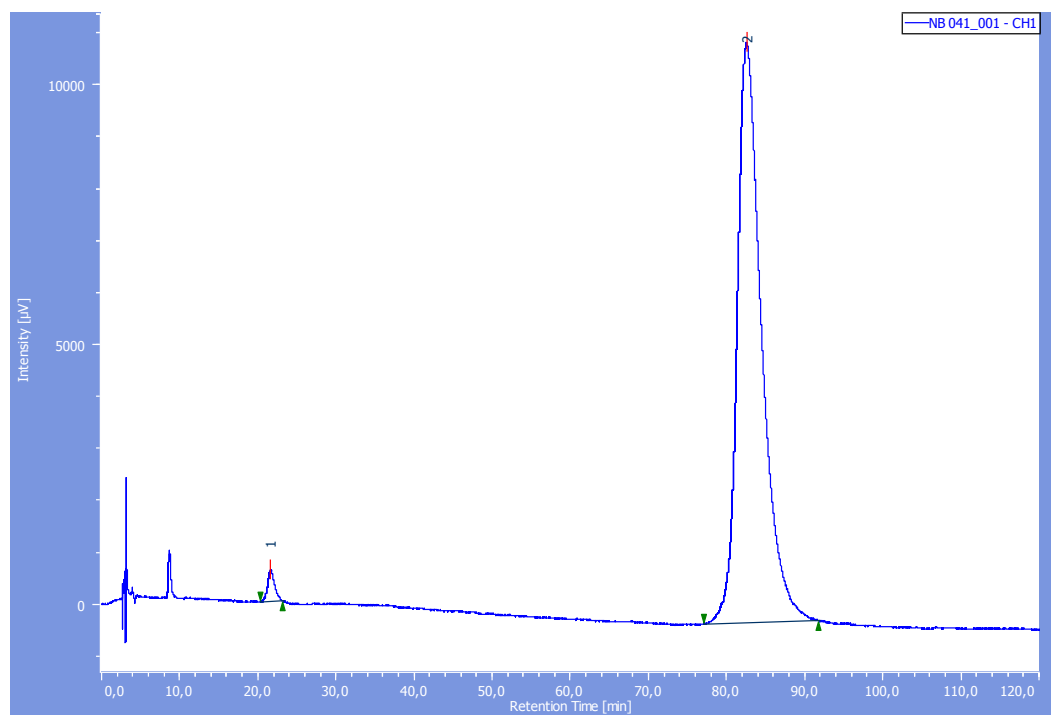

Chromatogram of the compound **5e** starting with (L)-phenylhydrazide **3e**

## 6. HPLC analysis of **5f**

High performance liquid chromatography (HPLC) was performed on a Welk RR column (4.6 × 250 mm) (REGIS Technologies) using a mobile phase: heptane / iPrOH / CH<sub>2</sub>Cl<sub>2</sub> (50/40/10) with a flow rate of 1.0 mL / min at 25 °C.

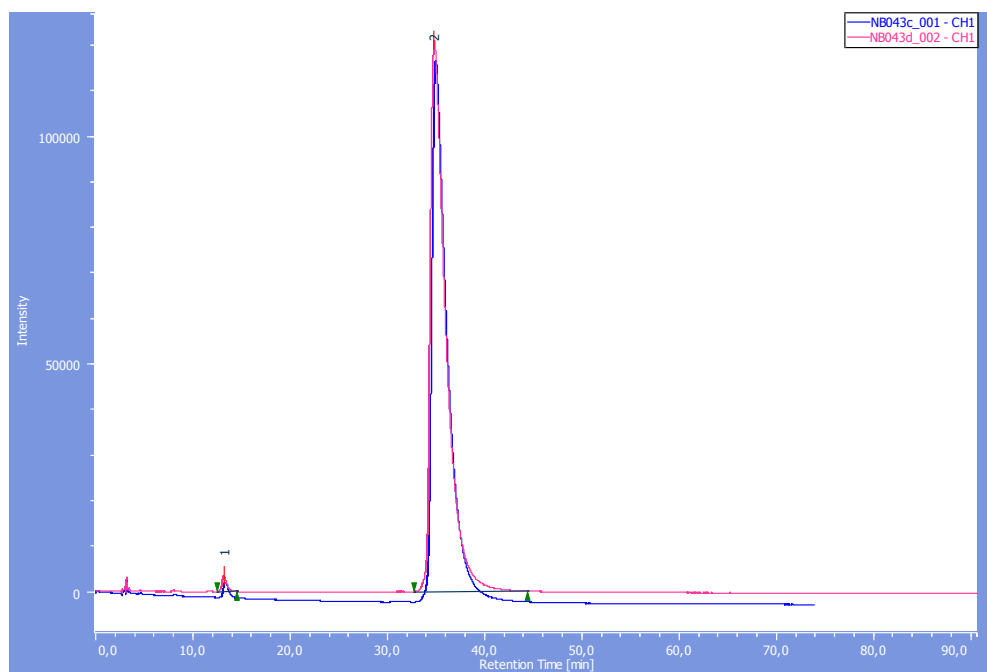

Chromatogram of the compound **5f** starting with (L)-phenylhydrazide **3f**

## 7. HPLC analysis of **5g**

High performance liquid chromatography (HPLC) was performed on a Welk RR column (4.6 × 250 mm) (REGIS Technologies) using a mobile phase: heptane / iPrOH / CH<sub>2</sub>Cl<sub>2</sub> (50/40/10) with a flow rate of 1.0 mL / min at 25 °C.

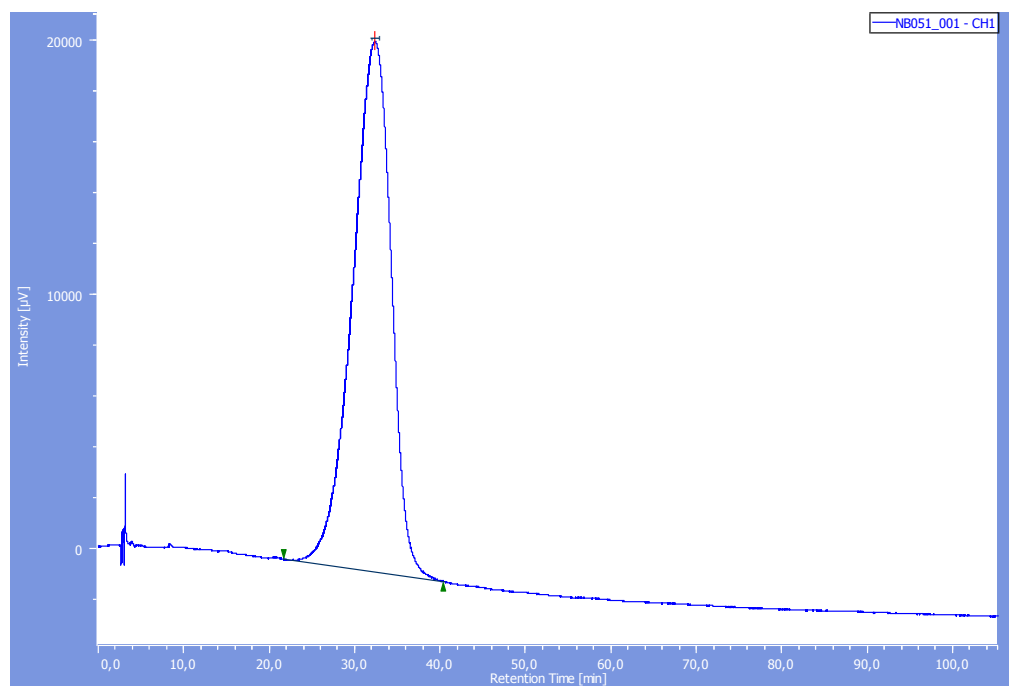

Chromatogram of the compound **5g** starting with (L)-phenylhydrazide **3g**

## 8. HPLC analysis of **5h**

High performance liquid chromatography (HPLC) was performed on a Welk RR column (4.6 × 250 mm) (REGIS Technologies) using a mobile phase: heptane / iPrOH / CH<sub>2</sub>Cl<sub>2</sub> (50/40/10) with a flow rate of 1.0 mL / min at 25 °C.

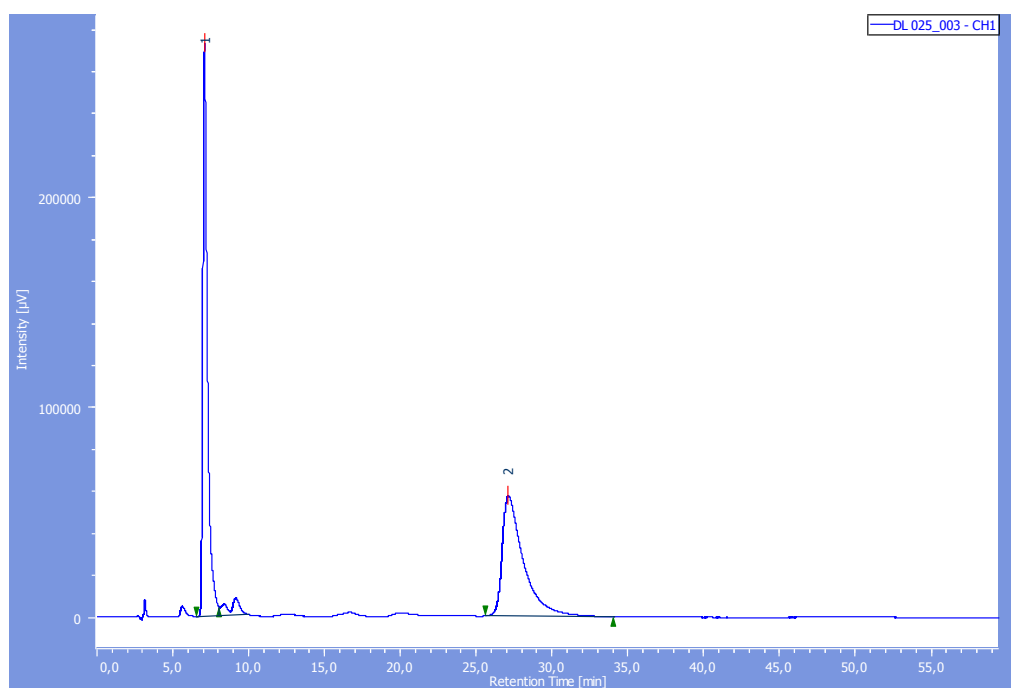

Chromatogram of the compound **5h** starting with the racemic phenylhydrazide **3h**

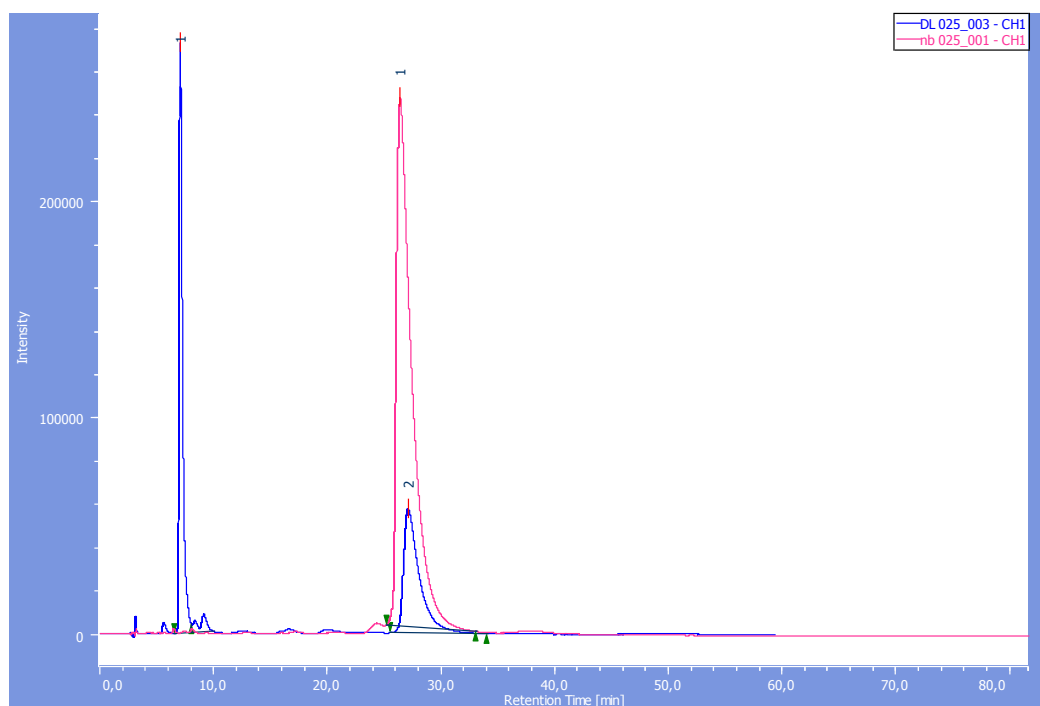

Chromatogram of the compound **5h** starting with (L)-phenylhydrazide **3h**

## 9. HPLC analysis of **5i**

High performance liquid chromatography (HPLC) was performed on a Welk RR column (4.6 × 250 mm) (REGIS Technologies) using a mobile phase: heptane / iPrOH / CH<sub>2</sub>Cl<sub>2</sub> (50/40/10) with a flow rate of 1.0 mL / min at 25 °C.

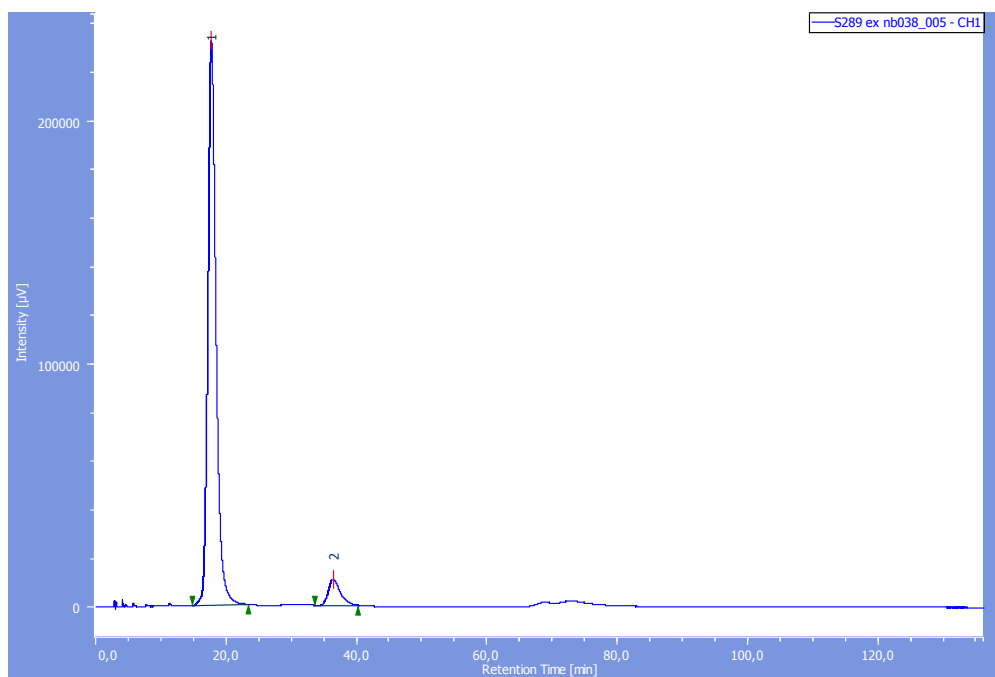

Chromatogram of the compound **5i** in the racemic form and starting with (L)-phenylhydrazide **3i**

#### 10. HPLC analysis of **5j**

High performance liquid chromatography (HPLC) was performed on a Welk RR column (4.6 × 250 mm) (REGIS Technologies) using a mobile phase: heptane / iPrOH / CH<sub>2</sub>Cl<sub>2</sub> (50/40/10) with a flow rate of 1.0 mL / min at 25 °C.

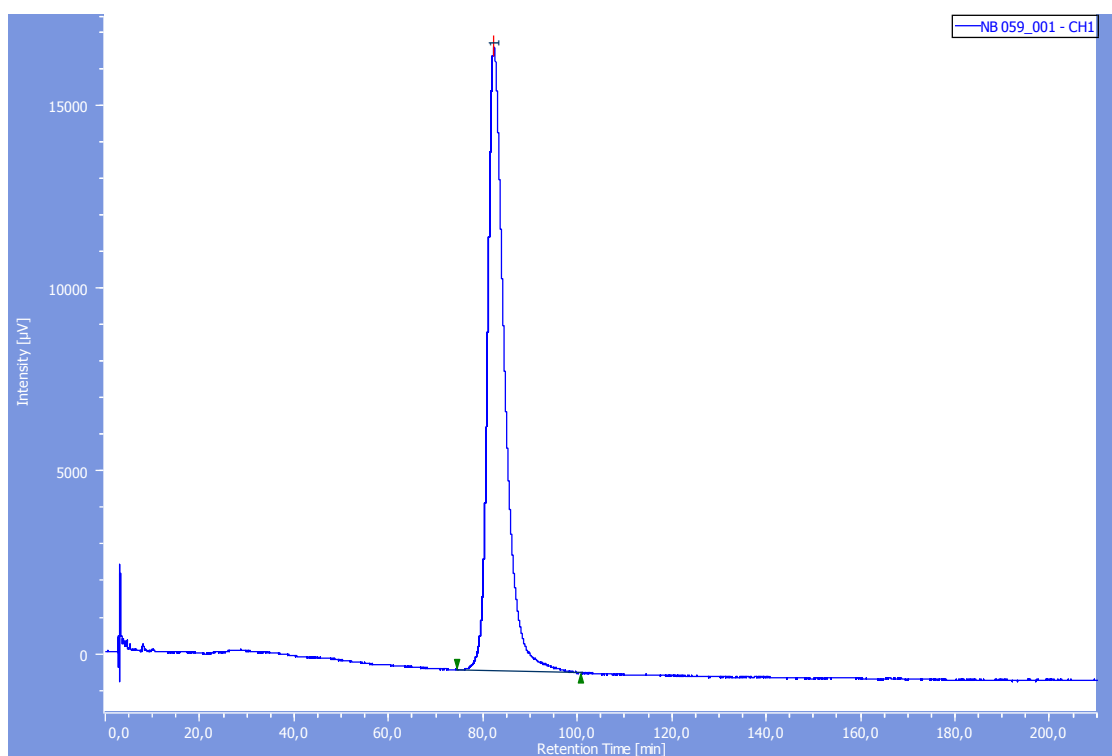

Chromatogram of the compound **5j** starting with (L)-phenylhydrazide **3j**

11. Tables of retention times and ratios

| <b>Table 1: HPLC analysis of the compounds <b>5</b> starting with (L)-arylhydrazide <b>3</b></b> |                                        |                     |                 |                 |                       |
|--------------------------------------------------------------------------------------------------|----------------------------------------|---------------------|-----------------|-----------------|-----------------------|
| <b>Compound</b>                                                                                  | <b>Retention times<br/>(min)</b>       | <b>Area</b>         | <b>Height</b>   | <b>Area (%)</b> | <b>Height<br/>(%)</b> |
| <b>5a</b>                                                                                        | $t_r(1) = 12.56$<br>$t_r(2) = 33.04$   | 104274<br>14372948  | 3230<br>129432  | 0.72<br>99.28   | 2.435<br>97.565       |
| <b>5b</b>                                                                                        | 24.32                                  | 1549623             | 22079           | 100             | 100                   |
| <b>5c</b>                                                                                        | 21.222                                 | 6602367             | 46520           | 100             | 100                   |
| <b>5d</b>                                                                                        | $t_r(1) = 18.55$<br>$t_r(2) = 33.96$   | 6289878<br>6255211  | 112666<br>69641 | 50.13<br>49.86  | 60.8<br>38.2          |
| <b>5e</b>                                                                                        | $t_r(1) = 21.612$<br>$t_r(2) = 82.445$ | 36782<br>2417900    | 598<br>11143    | 1.498<br>98.502 | 5.093<br>94.907       |
| <b>5f</b>                                                                                        | $t_r(1) = 13.172$<br>$t_r(2) = 34.792$ | 121372<br>13384956  | 3446<br>120671  | 0.899<br>99.101 | 2.777<br>97.223       |
| <b>5g</b>                                                                                        | 30.22                                  | 3073988             | 9823            | 100             | 100                   |
| <b>5h</b>                                                                                        | 26.382                                 | 23202810            | 243831          | 100             | 100                   |
| <b>5i</b>                                                                                        | $t_r(1) = 17.738$<br>$t_r(2) = 36.418$ | 20256023<br>1354870 | 231702<br>10584 | 93.731<br>6.269 | 95.632<br>4.368       |
| <b>5j</b>                                                                                        | 82.245                                 | 4280786             | 17038           | 100             | 100                   |

| <b>Table 2: HPLC analysis of the compounds <b>5</b> starting with the racemic arylhydrazides <b>3</b></b> |                                        |                      |                  |                  |                       |
|-----------------------------------------------------------------------------------------------------------|----------------------------------------|----------------------|------------------|------------------|-----------------------|
| <b>Compound</b>                                                                                           | <b>Retention times<br/>(min)</b>       | <b>Area</b>          | <b>Height</b>    | <b>Area (%)</b>  | <b>Height<br/>(%)</b> |
| <b>5a</b>                                                                                                 | $t_r(1) = 12.158$<br>$t_r(2) = 33.083$ | 1759890<br>1731411   | 55831<br>16224   | 50.408<br>49.592 | 77.484<br>22.516      |
| <b>5b</b>                                                                                                 | $t_r(1) = 7.2$<br>$t_r(2) = 24.46$     | 14584432<br>14619815 | 837955<br>204368 | 49.939<br>50.061 | 80.393<br>19.607      |
| <b>5d</b>                                                                                                 | $t_r(1) = 19.553$<br>$t_r(2) = 35.792$ | 2701250<br>2711097   | 39036<br>32914   | 49.926<br>50.074 | 61.427<br>38.573      |
| <b>5h</b>                                                                                                 | $t_r(1) = 7.075$<br>$t_r(2) = 27.085$  | 5697073<br>5544905   | 272298<br>57144  | 50.677<br>49.323 | 82.654<br>17.346      |
